# Supplementary material for: IPF-Fibroblast Erk1/2 Activity Is Independent from microRNA Cluster 17-92 but Can Be Inhibited by Treprostinil through DUSP1
Source: MDPI journal article supplement (doi:10.3390/cells10112836), 2021-10-21
Supplement: s1 [file s1]

**Table S1. Primer sequences for PCR-based promotor generation and Sanger DNA sequencing.** FWD: forward; REV: reverse.

| <b>Promoter</b>                                     | <b>direction</b> | <b>Primers (restriction enzymes sites bolded)</b> |
|-----------------------------------------------------|------------------|---------------------------------------------------|
| HindIIIPro 1                                        | FWD              | GCG <b>AAGCTT</b> GGGGAGGTCGGAAGTACTTT            |
| SacIPro 1                                           | REV              | GCG <b>GAGCTC</b> GCGTACAAAGTTTGGGGAAC            |
| HindIIIPro 2                                        | FWD              | GCG <b>AAGCTT</b> GTTCCCCAACTTTGTACGC             |
| SacIPro 2                                           | REV              | GCG <b>GAGCTC</b> CCCACAGACTATTCTTCACC            |
| HindIIIPro3 second                                  | FWD              | GCG <b>AAGCTT</b> GGCTCGTCGTTGCAATATCAC           |
| SacIPro3 forth                                      | REV              | GCG <b>GAGCTC</b> GAGGAAATCTTCACATCCACG           |
| HindIIIPro 1                                        | FWD              | GCG <b>AAGCTT</b> GGGGAGGTCGGAAGTACTTT            |
| SacIPro 2                                           | REV              | GCG <b>GAGCTC</b> CCCACAGACTATTCTTCACC            |
| HindIIIPro 2                                        | FWD              | GCG <b>AAGCTT</b> GTTCCCCAACTTTGTACGC             |
| SacIPro3 second                                     | REV              | GCG <b>GAGCTC</b> GGCAATCATAACCAACCATCC           |
| HindIIIPro 1                                        | FWD              | GCG <b>AAGCTT</b> GGGGAGGTCGGAAGTACTTT            |
| SacIPro3 second                                     | REV              | GCG <b>GAGCTC</b> GGCAATCATAACCAACCATCC           |
| <b>Sanger DNA sequencing for promoter sequences</b> | <b>direction</b> | <b>Primers</b>                                    |
| Promoter sequence 1                                 | FWD              | GGGGAGGTCGGAAGTACTTT                              |
| Promoter sequence 1                                 | REV              | GCGTACAAAGTTTGGGGAAC                              |
| Promoter sequence 2                                 | FWD              | GTTCCCCAACTTTGTACGC                               |
| Promoter sequence 2                                 | REV              | CCCACAGACTATTCTTCACC                              |
| Promoter sequence 3                                 | FWD              | GGTGAAGAATAGTCTGTGGG                              |
| Promoter sequence 3                                 | REV              | AAGTGGTGGCTCTTCCAATG                              |
